# Supplementary material
Source: PubMed Central journal article supplement (PMC3091480)
Supplement: pr1012812_si_001.pdf [file pr1012812_si_001.pdf]

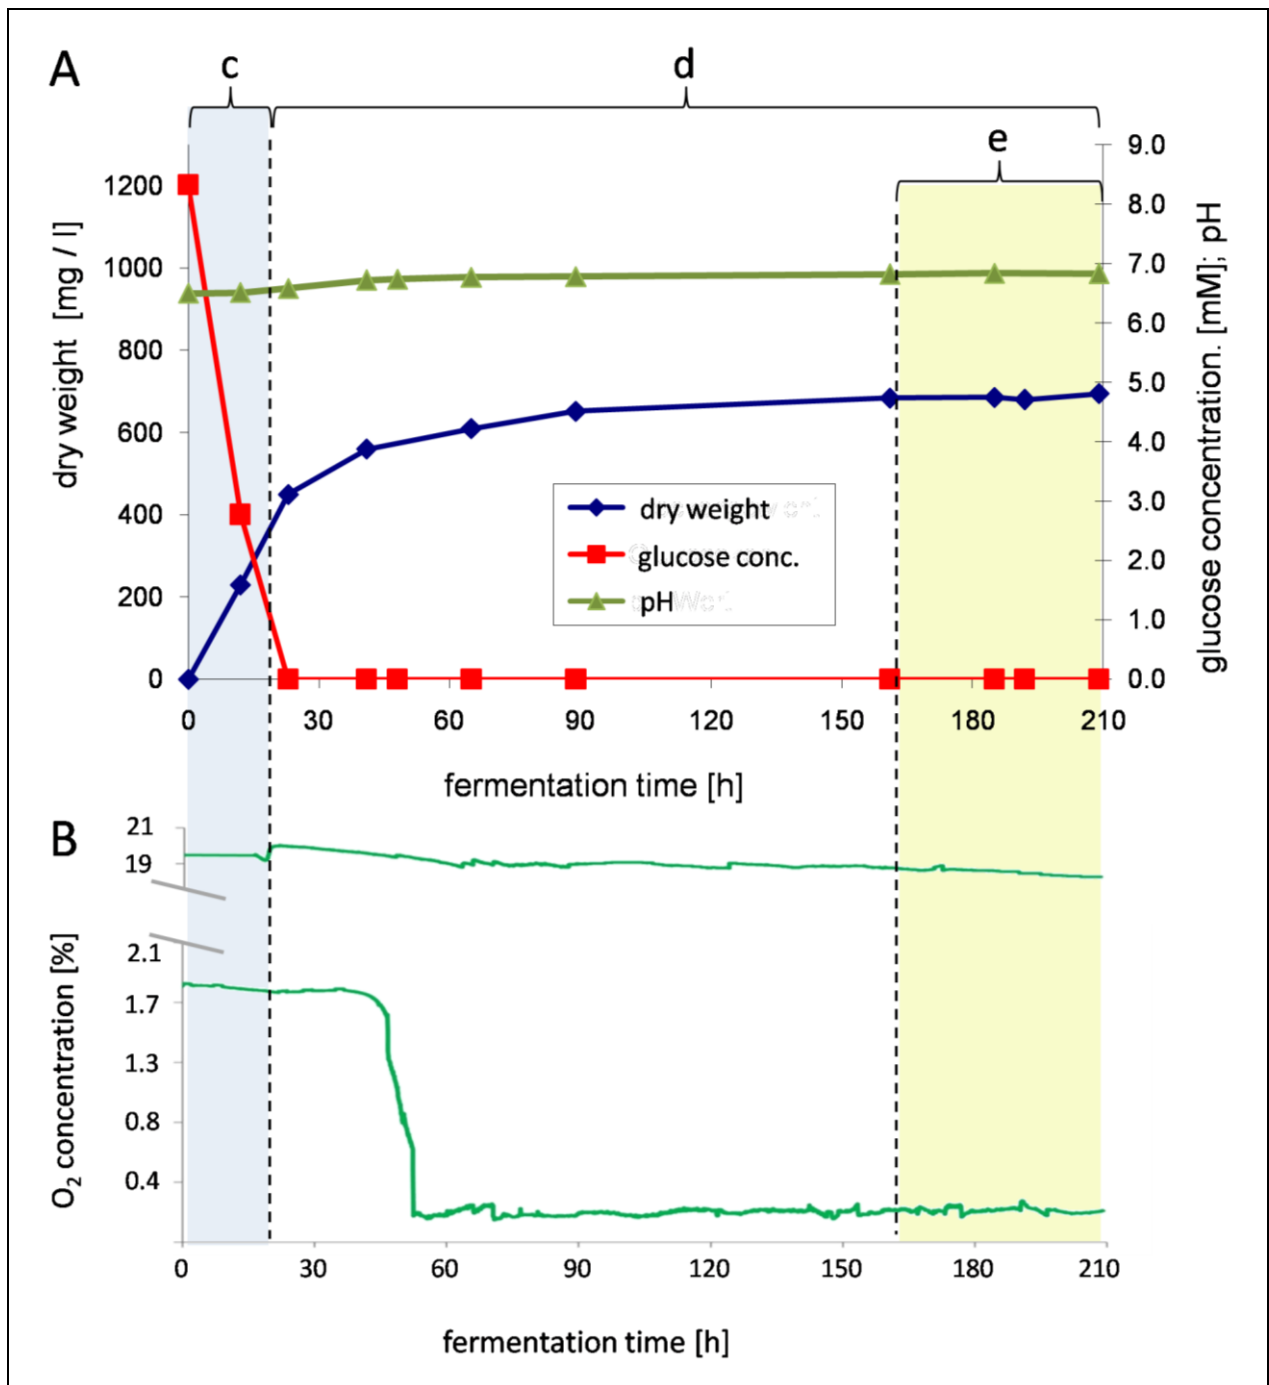

**Figure S1.** Diagram of a typical chemostat cultivation of *A. fumigatus*. **(A)** Glucose (red squares) is almost completely consumed during the initial batch phase (c). Glucose is the growth limiting factor during continuous cultivation (d) and the glucose concentration drops down to zero. After reaching the steady state (e), growth parameter like pH (green triangles), biomass (blue diamonds) and oxygen concentration (green line) remain constant. **(B)** Adjustment of a defined and constant oxygen concentration in the oxygen-controlled fermenter system for *A. fumigatus*.
